# Supplementary material for: Spermidine Ameliorates Colitis via Induction of Anti-Inflammatory Macrophages and Prevention of Intestinal Dysbiosis
Source: PubMed Central journal article supplement — J Crohns Colitis. 2023 Mar 30;17(9):1489–503. doi: 10.1093/ecco-jcc/jjad058 (PMC10588784; doi:10.1093/ecco-jcc/jjad058), 2023-03-30
Supplement: jjad058_suppl_supplementary_figures.pdf [file jjad058_suppl_supplementary_figures.pdf]

# Supplementary figure 1

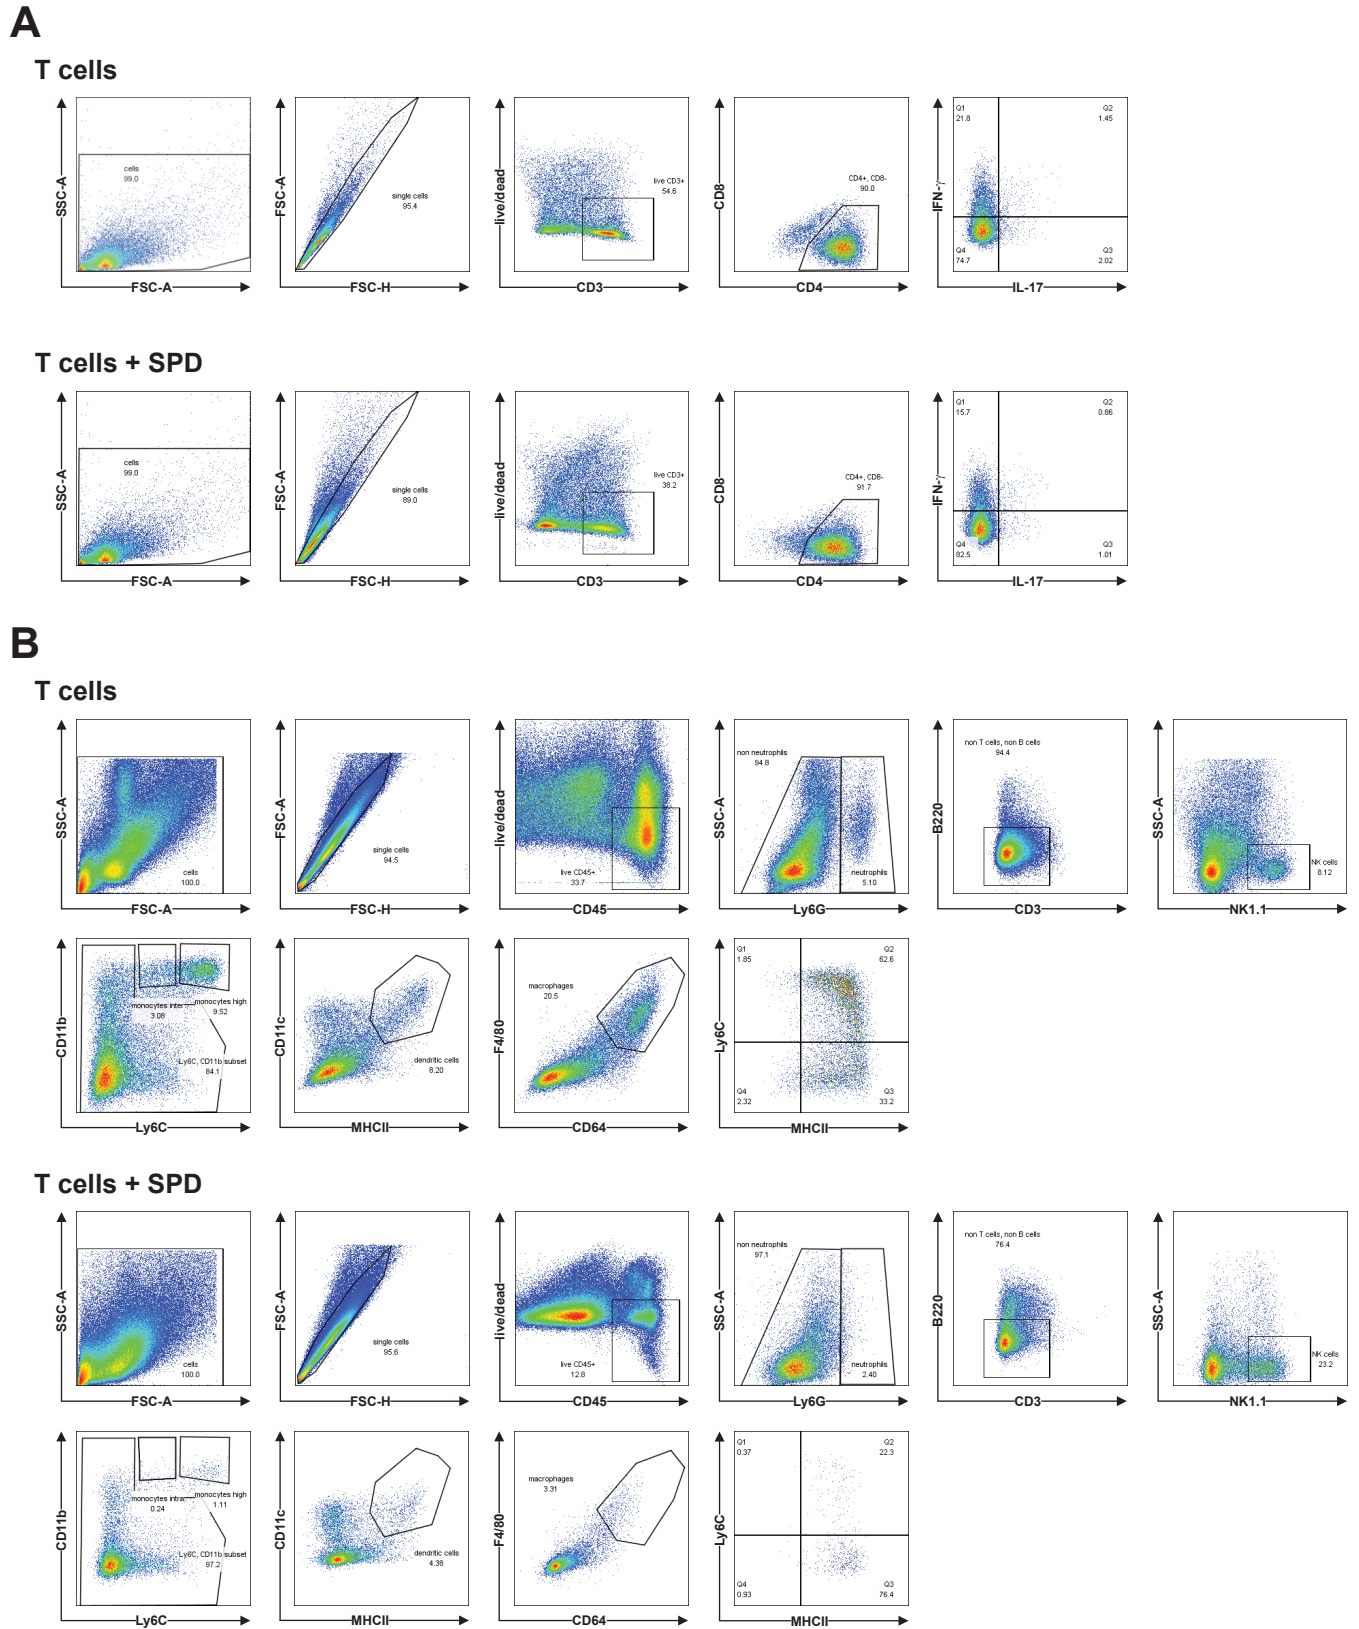

# Supplementary figure 2

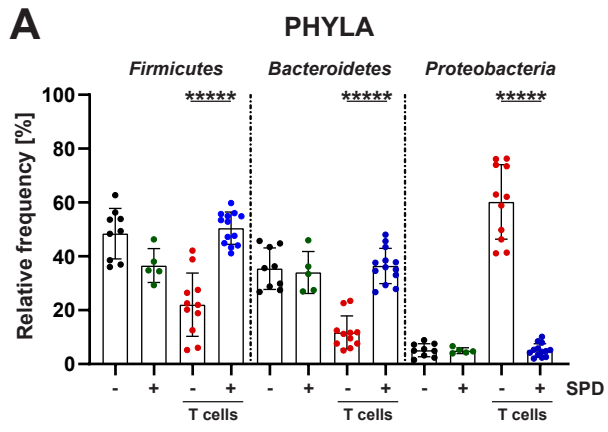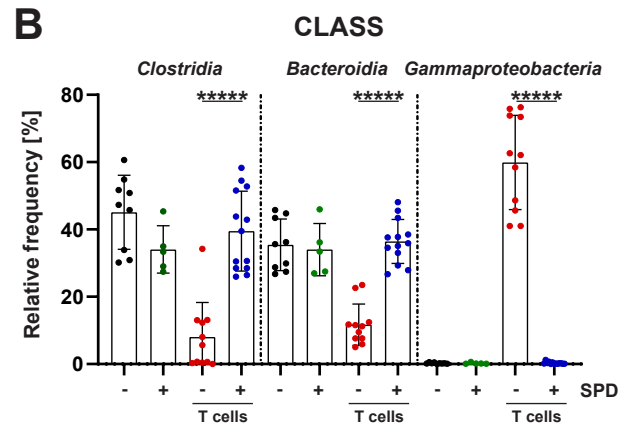

# Supplementary figure 3

**A**

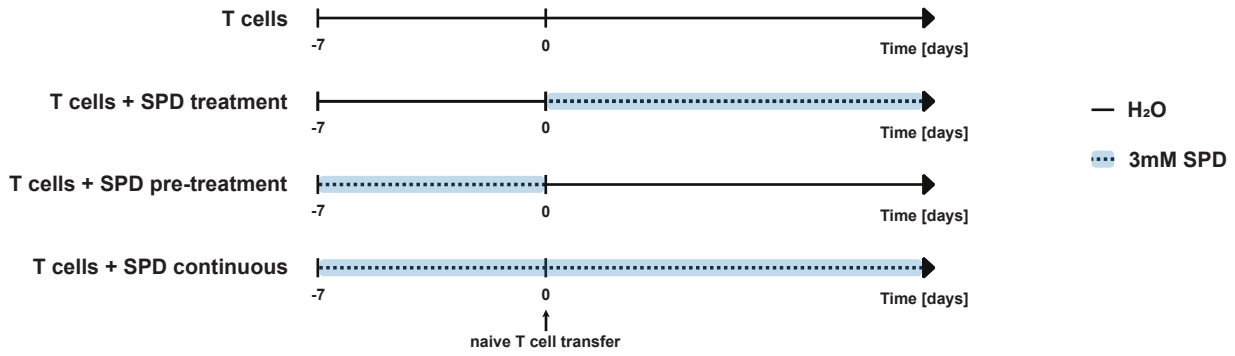

**B**

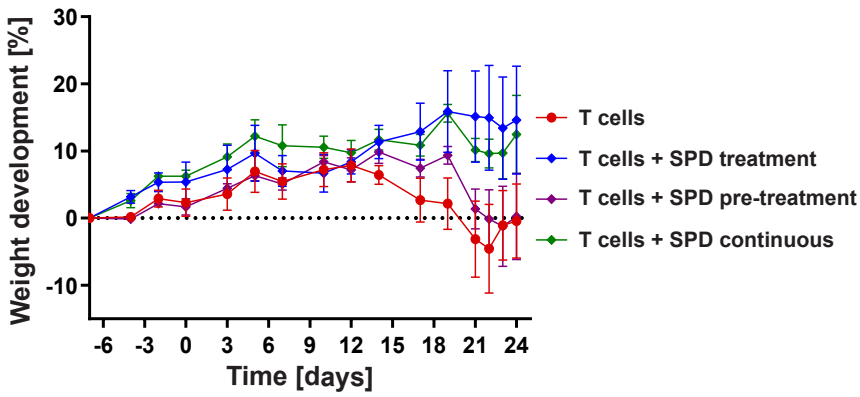

**E**

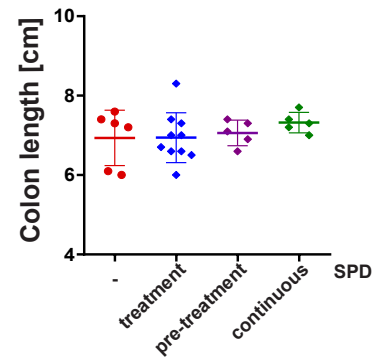

**C**

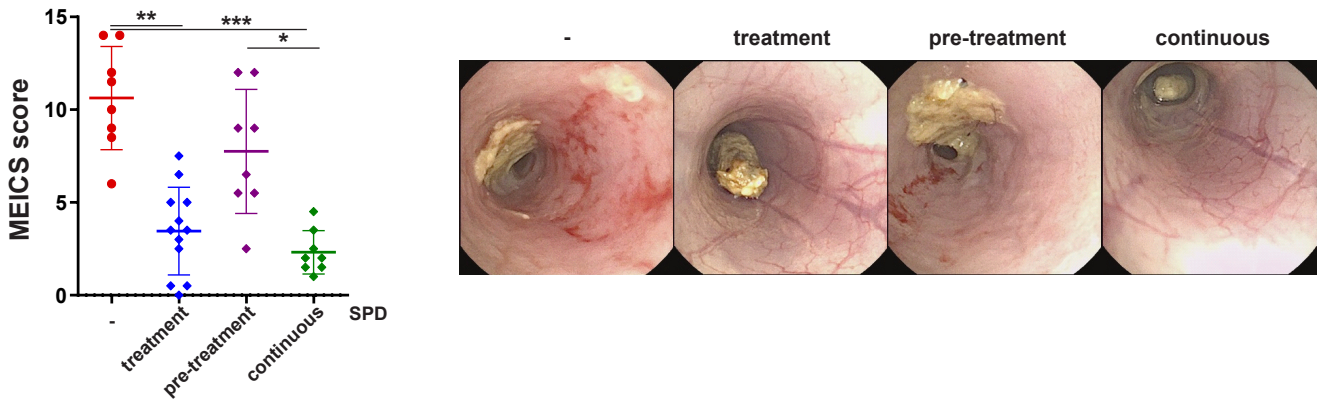

**D**

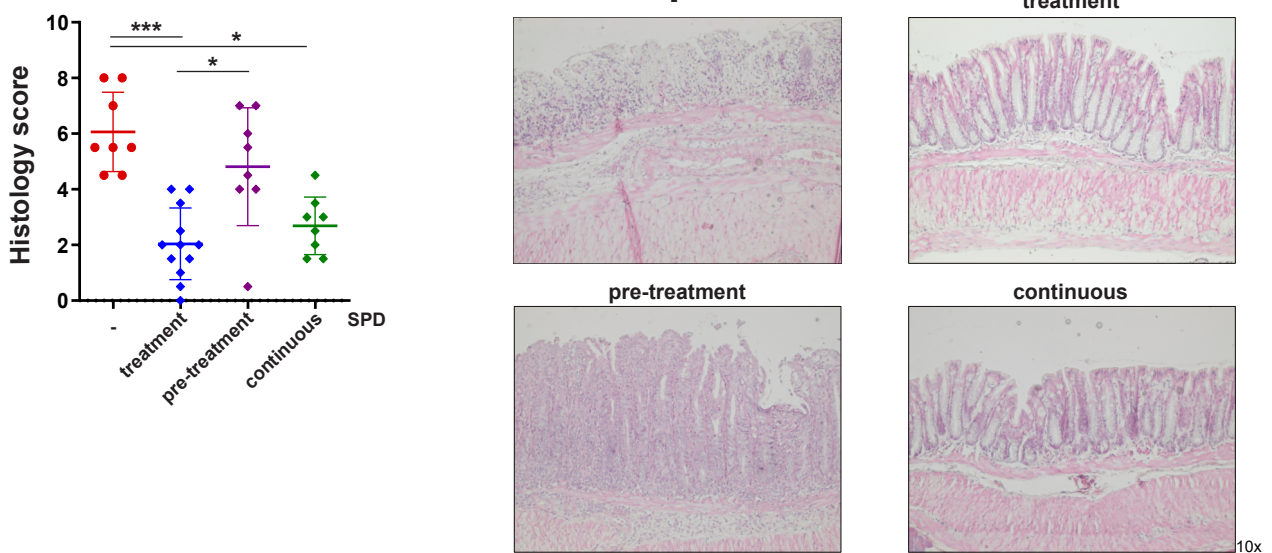

# Supplementary figure 4

**A**

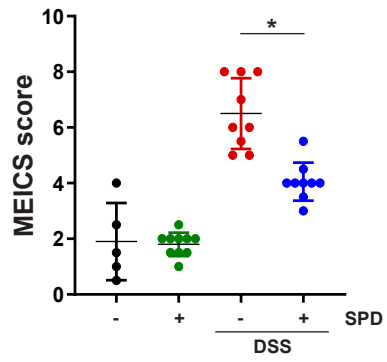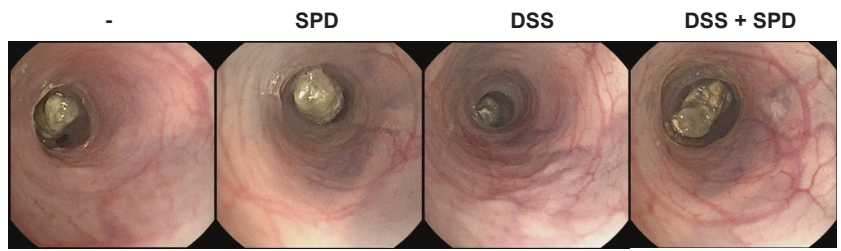

**B**

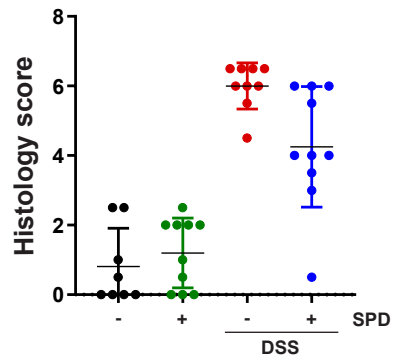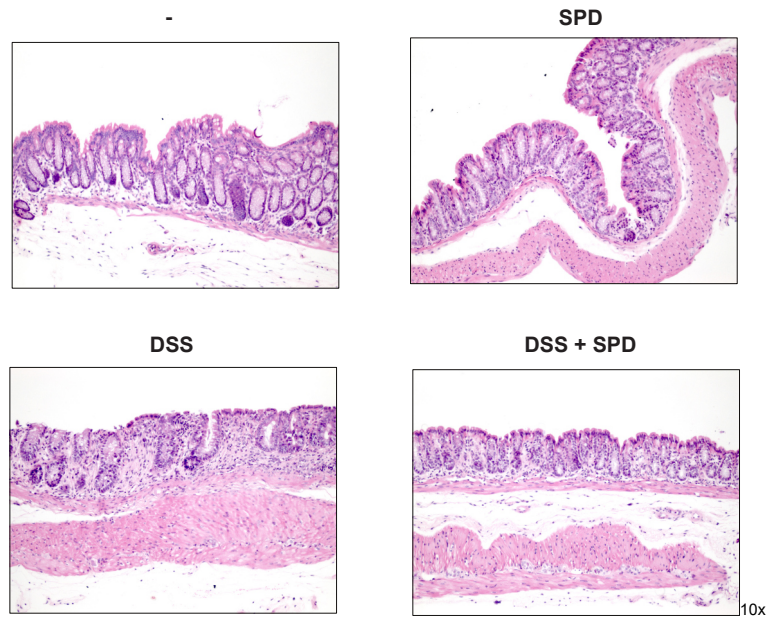

# Supplementary figure 5

**A**

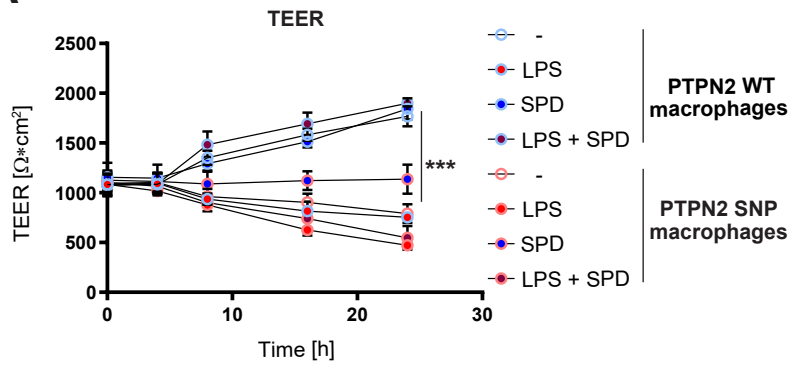

**B**

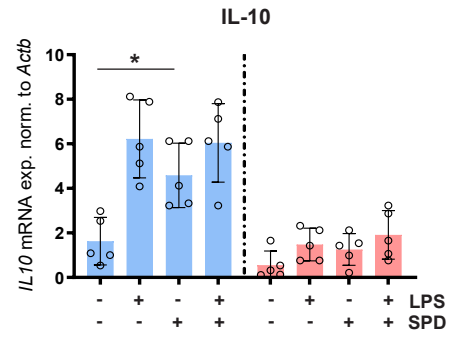

**C**

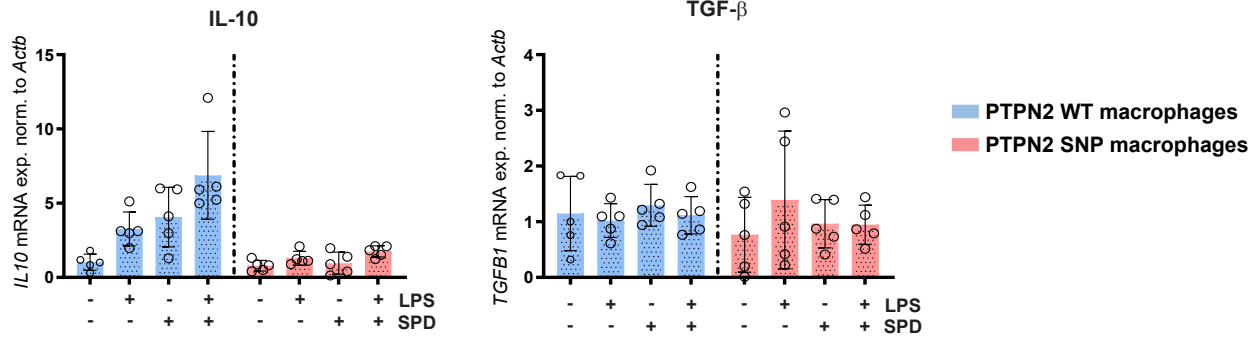

# Supplementary figure 6

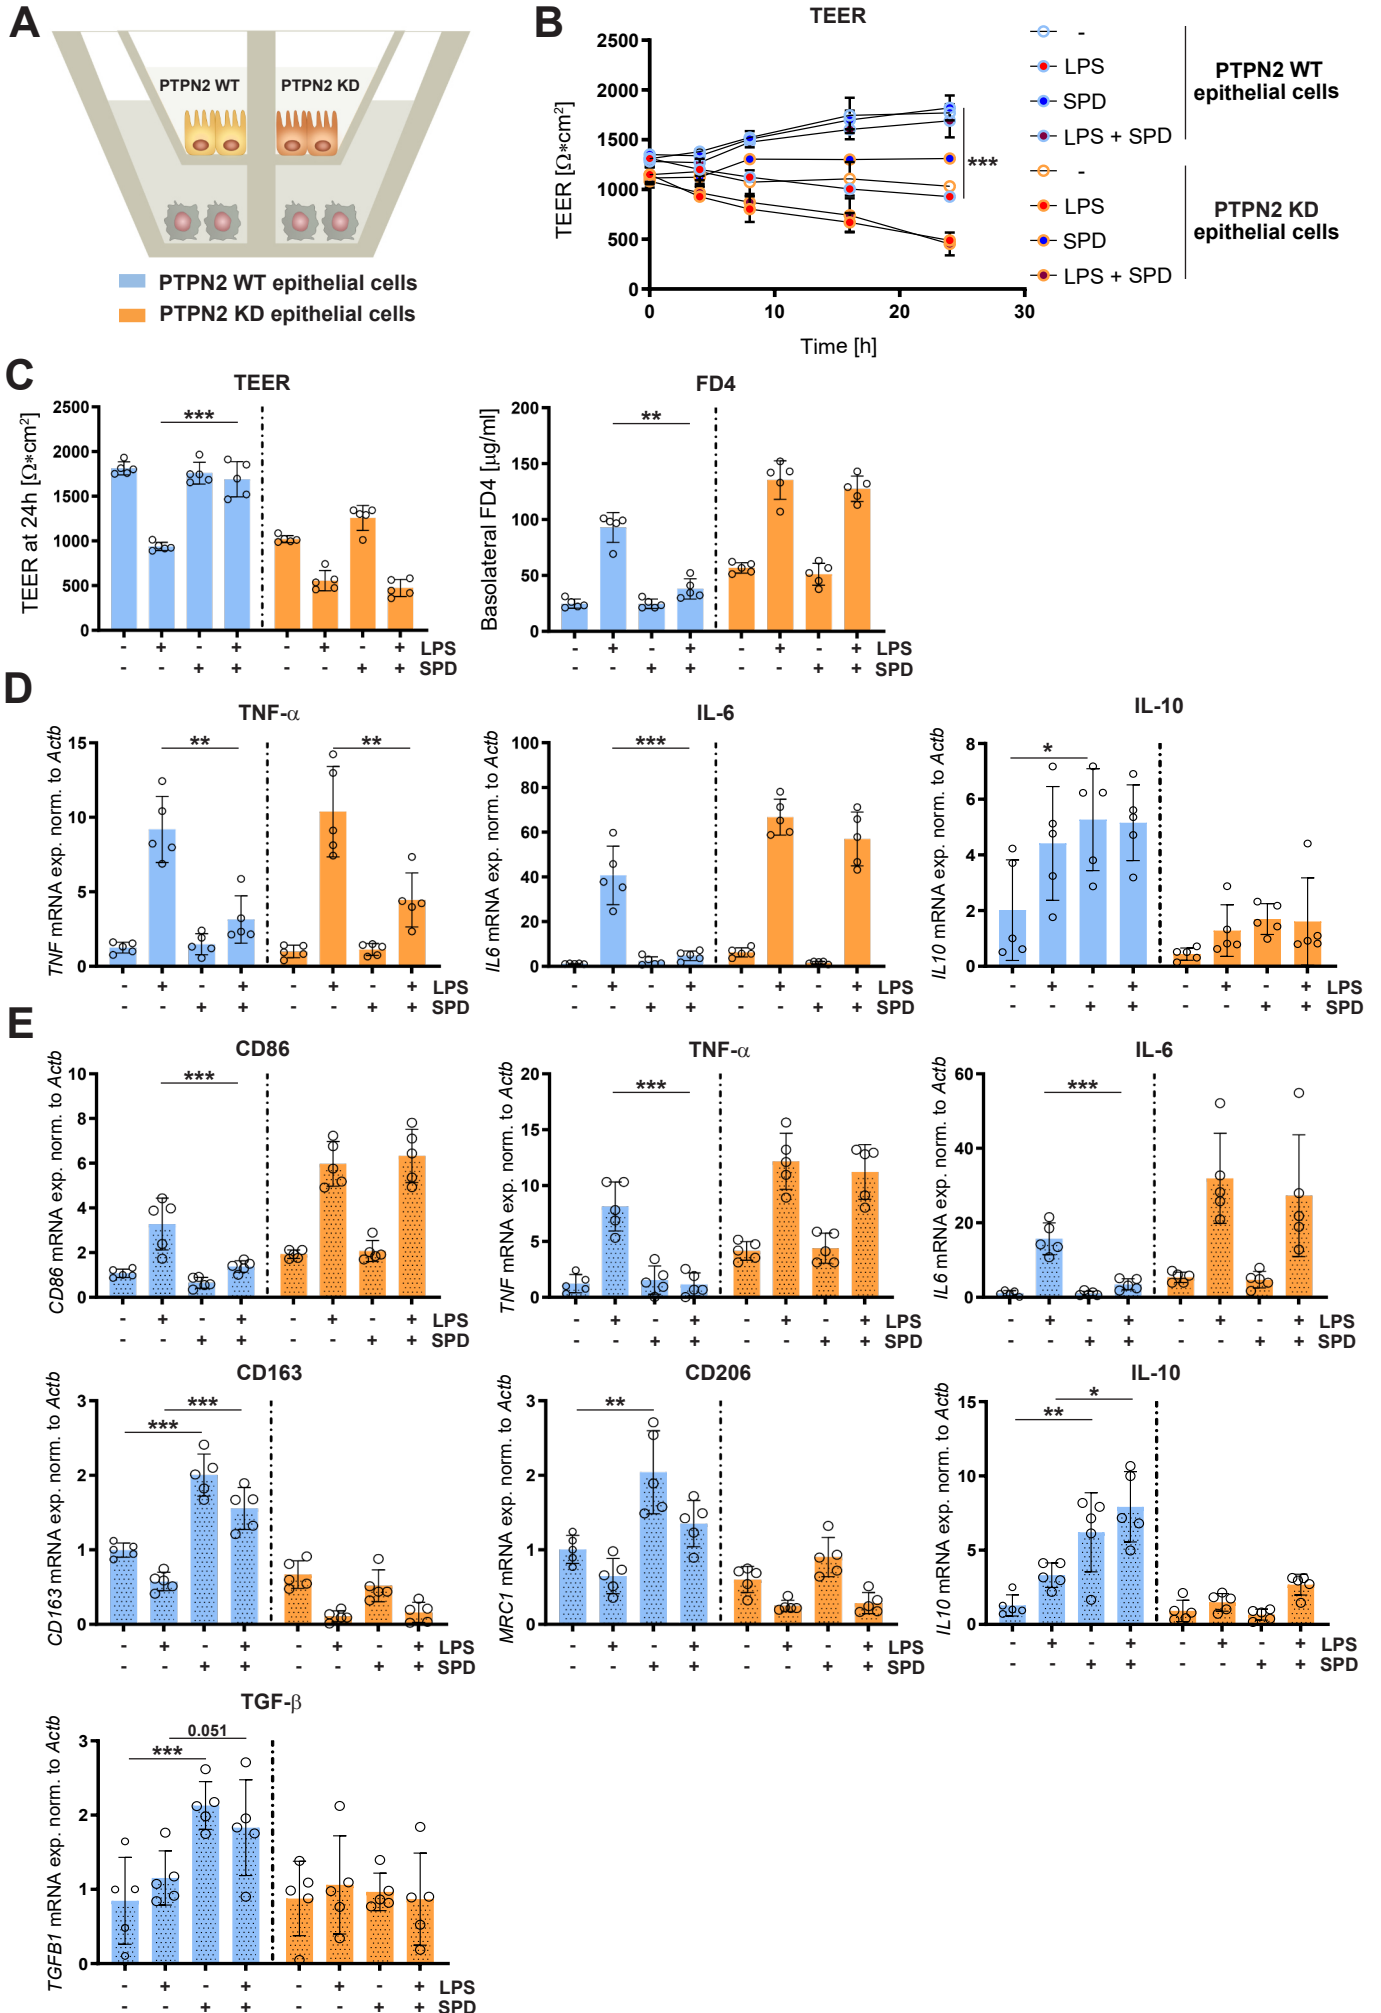

# Supplementary table I

| taxonomic rank                            | operational taxonomic unit (OTU) | difference in mean level             | adjusted p value           |
|-------------------------------------------|----------------------------------|--------------------------------------|----------------------------|
| PHYLUM                                    | <i>Actinobacteria</i>            | 12.45                                | 0.02275                    |
|                                           | <i>Bacteroidetes</i>             | 20.00                                | 3.83474 x 10 <sup>-7</sup> |
|                                           | <i>Cyanobacteria</i>             | 12.37                                | 7.32875 x 10 <sup>-5</sup> |
|                                           | <i>Deferribacteres</i>           | 4.34                                 | 0.75131                    |
|                                           | <i>Epsilonbacteraeota</i>        | 1.91                                 | 0.00300                    |
|                                           | <i>Firmicutes</i>                | 20.17                                | 1.85046 x 10 <sup>-7</sup> |
|                                           | <i>Patescibacteria</i>           | 15.27                                | 2.15756 x 10 <sup>-5</sup> |
|                                           | <i>Proteobacteria</i>            | 19.08                                | 1.14341 x 10 <sup>-6</sup> |
|                                           | <i>Tenericutes</i>               | 14.85                                | 4.40553 x 10 <sup>-5</sup> |
|                                           | <i>Verrucomicrobia</i>           | 5.56                                 | 0.33985                    |
|                                           | <i>Eukaryota</i>                 | 0.19                                 | 0.97817                    |
|                                           | <i>Unassigned</i>                | 4.15                                 | 0.00032                    |
|                                           | CLASS                            | <i>Actinobacteria Actinobacteria</i> | 0.08                       |
| <i>Actinobacteria Coriobacteriia</i>      |                                  | 12.45                                | 0.02275                    |
| <i>Bacteroidetes Bacteroidia</i>          |                                  | 20.00                                | 3.83474 x 10 <sup>-7</sup> |
| <i>Cyanobacteria Melainabacteria</i>      |                                  | 12.29                                | 7.88581 x 10 <sup>-5</sup> |
| <i>Cyanobacteria Oxyphotobacteria</i>     |                                  | 0.07                                 | 0.66806                    |
| <i>Deferribacteres Deferribacteres</i>    |                                  | 4.34                                 | 0.75131                    |
| <i>Epsilonbacteraeota Campylobacteria</i> |                                  | 1.91                                 | 0.00300                    |
| <i>Firmicutes Bacilli</i>                 |                                  | 12.52                                | 0.00336                    |
| <i>Firmicutes Clostridia</i>              |                                  | 16.37                                | 4.26063 x 10 <sup>-5</sup> |
| <i>Firmicutes Erysipelotrichia</i>        |                                  | 3.90                                 | 0.83060                    |
| <i>Firmicutes Negativicutes</i>           |                                  | 0.09                                 | 0.53414                    |
| <i>Patescibacteria Saccharimonadia</i>    |                                  | 15.27                                | 2.15756 x 10 <sup>-5</sup> |
| <i>Proteobacteria Alphaproteobacteria</i> |                                  | 9.59                                 | 0.02797                    |
| <i>Proteobacteria Deltaproteobacteria</i> |                                  | 14.89                                | 0.00164                    |
| <i>Proteobacteria Gammaproteobacteria</i> |                                  | 19.08                                | 1.15349 x 10 <sup>-6</sup> |
| <i>Tenericutes Mollicutes</i>             |                                  | 14.85                                | 4.40553 x 10 <sup>-5</sup> |
| <i>Verrucomicrobia Verrucomicrobiae</i>   |                                  | 5.56                                 | 0.33985                    |
| <i>Eukaryota</i>                          |                                  | 0.19                                 | 0.97817                    |
| <i>Unassigned</i>                         | 4.15                             | 0.00032                              |                            |

## Supplementary table II

| No. | PTPN2 genotype | Disease          | State of disease | Sex | Age | Medication                     |
|-----|----------------|------------------|------------------|-----|-----|--------------------------------|
| 1   | TT (wild type) | Colitis Ulcerosa | Remission        | M   | 59  | no treatment                   |
| 2   | TT (wild type) | Crohn's Disease  | Active           | M   | 40  | Infliximab                     |
| 3   | TT (wild type) | Colitis Ulcerosa | Active           | M   | 39  | Vedolizumab                    |
| 4   | TT (wild type) | Crohn's Disease  | Active           | M   | 48  | Vedolizumab                    |
| 5   | TT (wild type) | Colitis Ulcerosa | Active           | W   | 53  | Infliximab, Mesalazin          |
| 6   | CT (SNP)       | Crohn's Disease  | Active           | M   | 63  | Budenofalk, Adalimumab         |
| 7   | CT (SNP)       | Crohn's Disease  | Active           | M   | 45  | Budenofalk, Cetrolizumab pegol |
| 8   | CT (SNP)       | Colitis Ulcerosa | Active           | W   | 35  | Vedolizumab, Mesalazin         |
| 9   | CT (SNP)       | Colitis Ulcerosa | Remission        | M   | 45  | Mesalazin                      |
| 10  | CT (SNP)       | Colitis Ulcerosa | Active           | M   | 46  | Infliximab                     |
